# Supplementary material for: An explosive component in a December 2020 Milan earthquake suggests outgassing of deeply recycled carbon
Source: Springer Nature journal article supplement (doi:10.1038/s43247-021-00336-y), 2022-01-10
Supplement: MOESM1 [file 43247_2021_336_MOESM1_ESM.pdf]

## SUPPLEMENTARY INFORMATION

# An explosive component in a December 2020 Milan earthquake suggests outgassing of deeply recycled carbon

Marco Giovanni Malusà<sup>1\*</sup>, Enrico Brandmayr<sup>2</sup>, Giuliano Francesco Panza<sup>2</sup>, Fabio Romanelli<sup>3</sup>, Simona Ferrando<sup>4</sup> and Maria Luce Frezzotti<sup>1\*</sup>

<sup>1</sup> *Department of Earth and Environmental Sciences, University of Milano-Bicocca, Piazza della Scienza 4, 20126 Milan, Italy.*

<sup>2</sup> *Accademia Nazionale dei Lincei, Via della Lungara 10, 00165 Rome, Italy.*

<sup>3</sup> *Department of Mathematics and Geosciences, University of Trieste, via Weiss 4, 34128 Trieste, Italy.*

<sup>4</sup> *Department of Earth Sciences, University of Torino, Via Valperga Caluso 35, 10125 Torino, Italy.*

\* *Corresponding authors (email: marco.malusa@unimib.it; maria.frezzotti@unimib.it)*

### **Supplementary Information includes:**

#### **Supplementary Figures**

Supplementary Figure 1: Seismic stations used in the inversion and synthetic to observed signal correlation

#### **Supplementary Tables**

Supplementary Table 1: Event location and Moment Tensor Solution after INPAR and Genetic algorithm

Supplementary Table 2: Elastic parameters of the ambient rocks of the earthquake source used to compute volume change

Supplementary Table 3: Computed volume change and equivalent sphere radius for different cases

#### **Supplementary References**

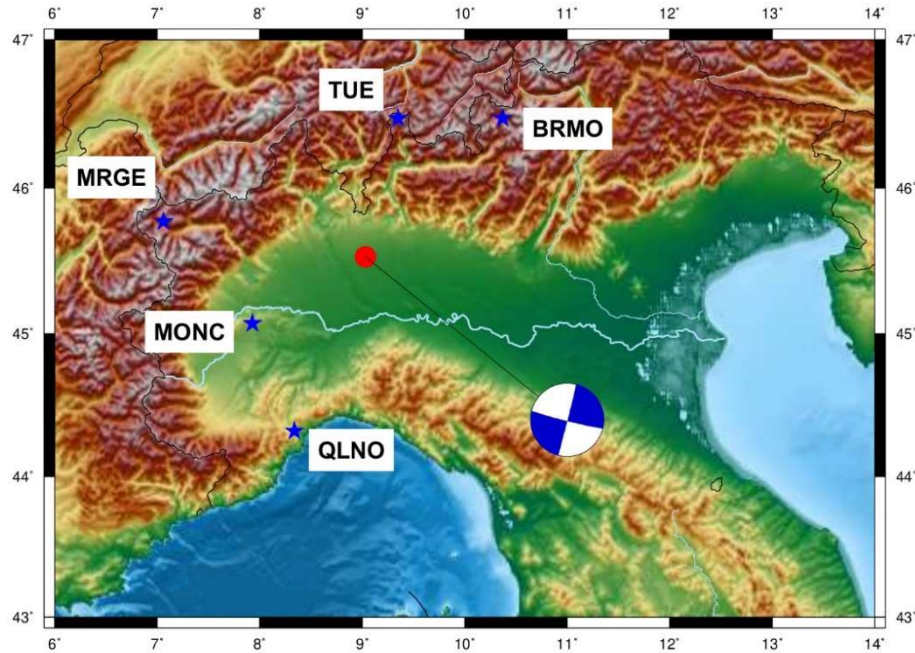

Observed and Synthetic Data

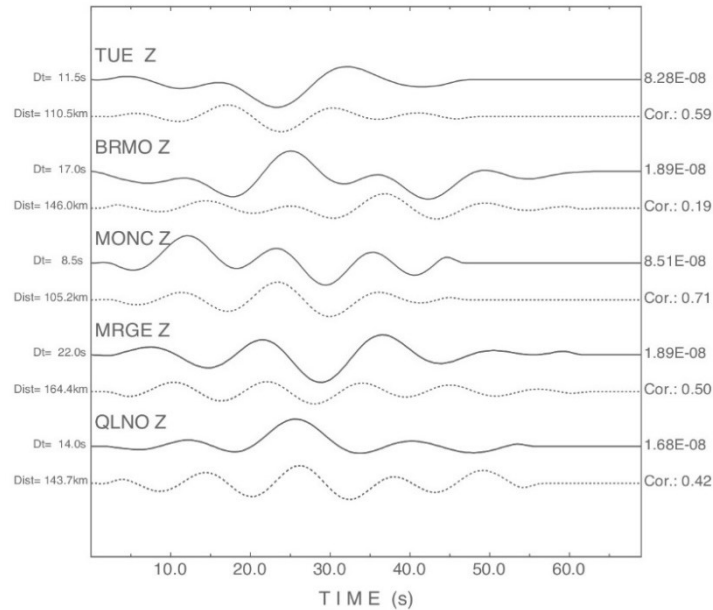

**Supplementary Figure 1. Seismic stations used in the inversion and synthetic to observed signal correlation.** The map shows the location of seismic stations used in the final inversion (blue stars), the event epicenter (red dot), and the best double-couple mechanism retrieved after inversion. The diagram illustrates the correlation between synthetic and observed records at each station. The epicentral distance (Dist) and the starting time (Dt) of the temporal window corresponding to each inverted signal are indicated on the left, the maximum amplitudes and correlation values (Cor) are shown on the right. Solid lines = data. Dotted lines = synthetic waveforms. Both synthetic and observed records are filtered at a cut-off frequency of 0.10 Hz. Image generated using Inkscape 1.0 (<https://inkscape.org>).

Supplementary Table 1.  
Event location and Moment Tensor Solution after INPAR and Genetic algorithm

|                     |             |
|---------------------|-------------|
| Date (yyyy-mm-dd)   | 2020-12-17  |
| UTC Time (hh.mm.ss) | 15.59.22    |
| Lon (°)             | 9.03±.17 E  |
| Lat (°)             | 45.53±.12 N |
| Depth (km)          | 66±20       |
| Strike (°)          | 104         |
| Dip (°)             | 87          |
| Rake (°)            | -179        |
| $M_{0tot}$ (Nm)     | 8.0E+15     |
| $M_{0iso}$ (Nm)     | 2.8E+15     |
| $M_w$               | 4.6         |

Supplementary Table 2. Elastic parameters of the ambient rocks of the earthquake source used to compute volume change (velocity is obtained from surface wave tomography <sup>1,2</sup>, density is obtained from gravimetric inversion <sup>3</sup>)

| $V_p$<br>(km s <sup>-1</sup> ) | $V_s$<br>(km s <sup>-1</sup> ) | Density<br>(kg m <sup>-3</sup> ) | $\lambda$<br>(Pa) | $\mu$<br>(Pa) |
|--------------------------------|--------------------------------|----------------------------------|-------------------|---------------|
| 8.1                            | 4.5                            | 3250                             | 8E+10             | 6.6E+10       |

Supplementary Table 3. Computed volume change and equivalent sphere radius for different cases

| Case           | $\Delta V$ (m <sup>3</sup> ) | Equivalent sphere radius (m) |
|----------------|------------------------------|------------------------------|
| Pure fluid     | 3.4E+04                      | 20                           |
| Crack-like     | 2.2E+04                      | 17                           |
| Compact source | 1.3E+04                      | 15                           |

## Supplementary References

1. Malusà, M. G., Frezzotti, M. L., Ferrando, S., Brandmayr, E., Romanelli, F., & Panza, G.F. Active carbon sequestration in the Alpine mantle wedge and implications for long-term climate trends. *Scientific Reports* **8**(1), 1-8 (2018).
2. Brandmayr, E. Raykova, R. B., Zuri, M., Romanelli, F., Doglioni, C. & Panza, G.F. The lithosphere in Italy: structure and seismicity. *J. V. Expl.* **36**, doi:10.3809/jvirtex.2010.00224 (2010).
3. Brandmayr, E., Marson, I., Romanelli, F., & Panza, G. F. (2011). Lithosphere density model in Italy: no hint for slab pull. *Terra Nova*, 23(5), 292-299.
